# Supplementary material
Source: MDPI journal article supplement (https://www.mdpi.com/2072-4292/13/10/1937)
Supplement: s1 [file s1]

*Supplement of*

**Long-term variation in the tropospheric nitrogen dioxide vertical column density over Korea and Japan from the MAX-DOAS network from 2007 to 2017**

**Yongjoo Choi et al.**

*Correspondence to:* Yongjoo Choi (choingjoo@jamstec.go.jp)

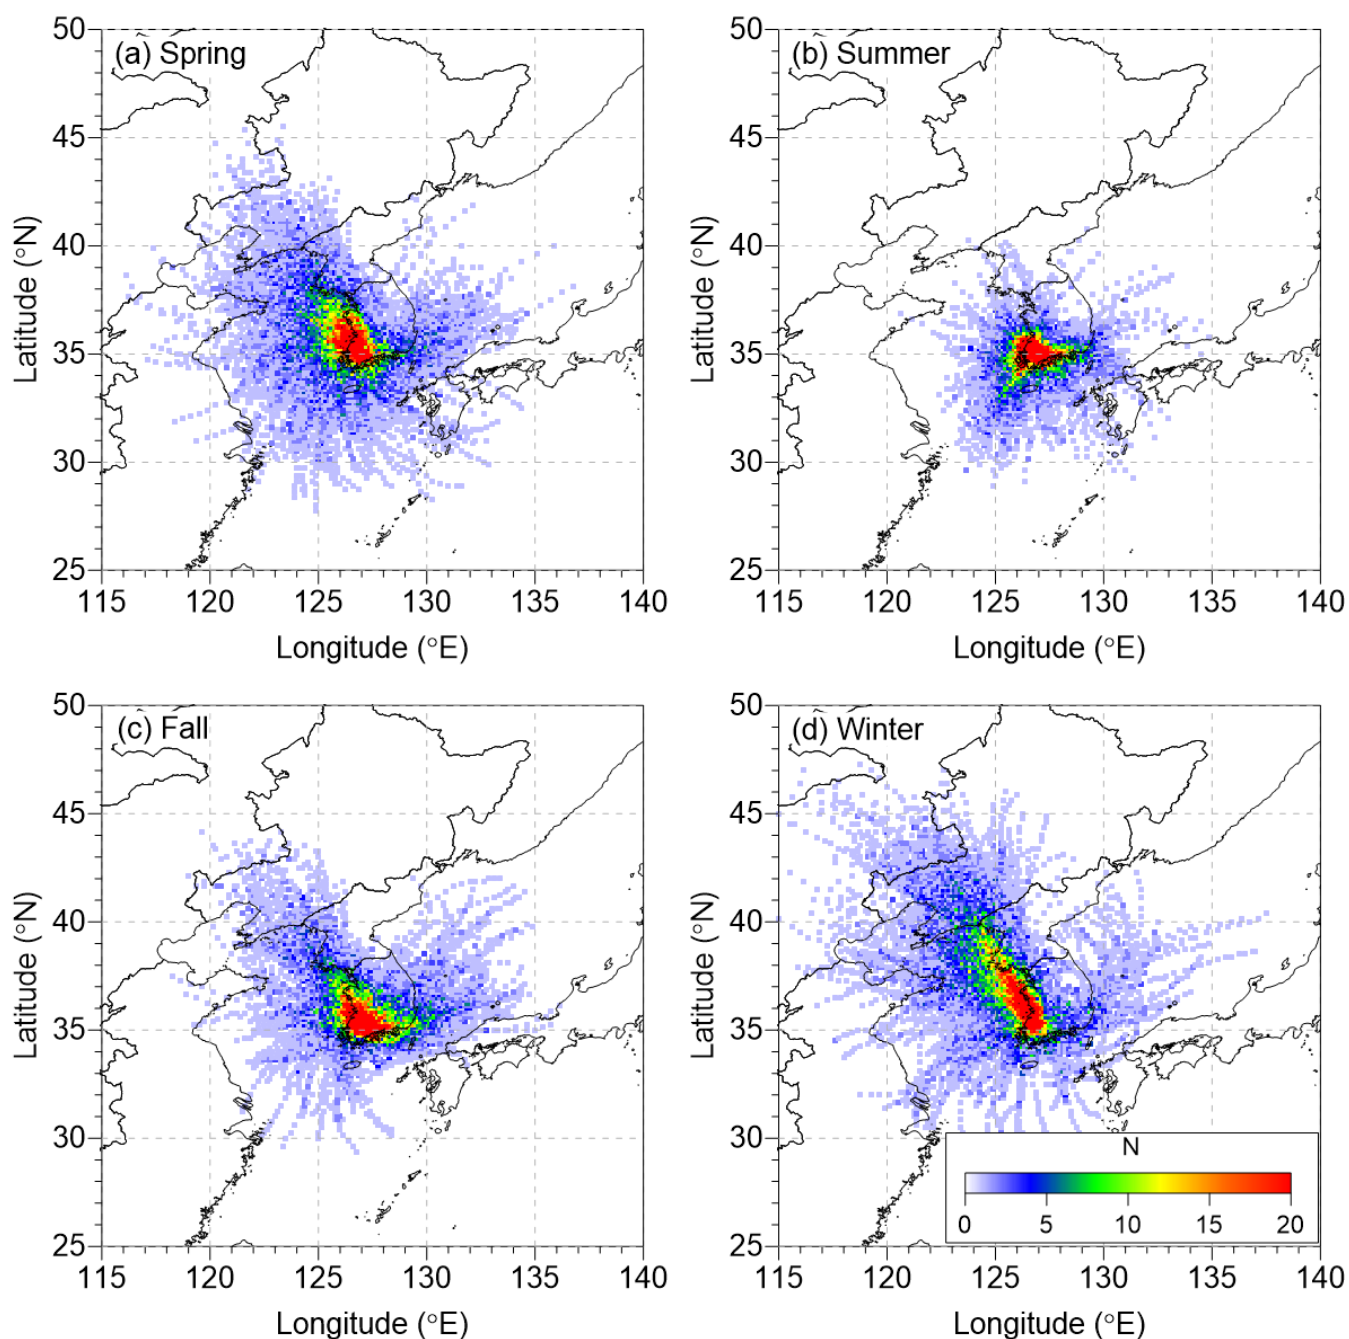

**Figure S1.** Footprint of the total number of backward trajectory endpoints for a  $0.25^\circ \times 0.25^\circ$  grid cell depending on the seasons at Gwangju, Korea when assuming different seasonal lifetimes of  $\text{NO}_2$  (24 h for winter, 18 h for spring and summer, and 12 h for summer). The backward trajectory was calculated from Hybrid Single Particle Lagrangian Integrated Trajectory (HYSPLIT) and the starting altitude and time were 500 m above ground level and three times per day (08:00, 12:00, and 16:00 LT), respectively. For more details, see the main text.

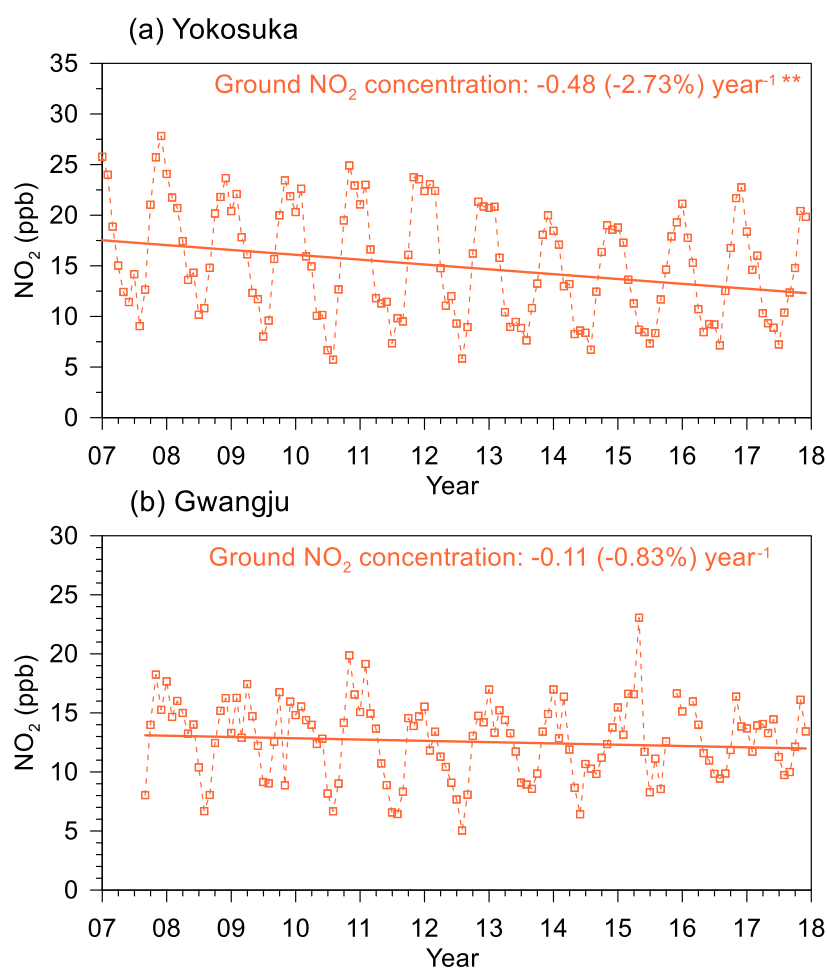

**Figure S2.** Long-term variations in the monthly mean ground-level NO<sub>2</sub> from 2007 to 2017 at (a) Yokosuka and (b) Gwangju. Orange symbols with dashed lines and solid lines denote the monthly mean and Theil-Sen slope of NO<sub>2</sub> from air quality monitoring sites nearby, respectively. The slopes and percent changes are shown in the upper right corner along with the p-value: \*\*  $p < 0.01$ , \*  $p < 0.05$ , +  $p < 0.1$ .

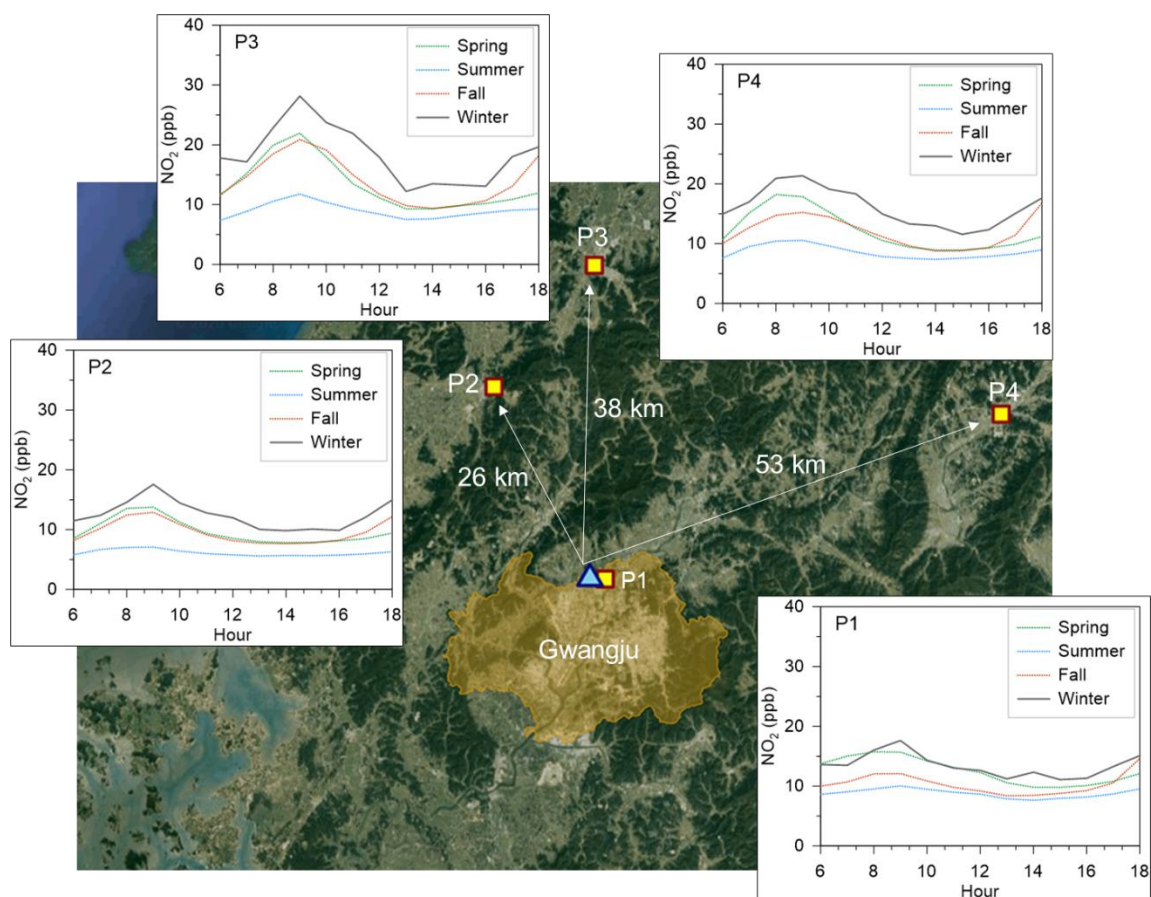

**Figure S3.** Site location and diurnal variation of ground NO<sub>2</sub> concentrations from air quality monitoring stations (P1 to P4) by season. The blue triangle indicates the Gwangju Institute of Science and Technology (GIST) site where the MAX-DOAS is installed. Each air quality monitoring station measured the ground NO<sub>2</sub> concentration (ppb) using a chemiluminescence instrument equipped with a molybdenum converter.

**Table S1.** Observed seasonal and overall Theil-Sen slopes of tropospheric NO<sub>2</sub> vertical column density (NO<sub>2</sub> TropVCD;  $\times 10^{15}$  molecules cm<sup>-2</sup>) from MAX-DOAS whole data points at four sites and ground NO<sub>2</sub> concentration (ppb) from air quality monitoring station at Yokosuka and Gwangju from 2007–2017. The values in parentheses indicate the percentage of Theil-Sen slopes to the mean NO<sub>2</sub> TropVCD or ground NO<sub>2</sub> concentration corresponding time scale.

|                                          | Spring            | Summer            | Fall              | Winter            | Overall           |
|------------------------------------------|-------------------|-------------------|-------------------|-------------------|-------------------|
| (a) MAX-DOAS (whole data points)         |                   |                   |                   |                   |                   |
| Yokosuka                                 | -0.62 (-3.75 %)** | -0.29 (-2.73 %)** | -1.01 (-4.28 %)** | -1.50 (-4.88 %)** | -0.91 (-4.40 %)** |
| Gwangju                                  | -0.01 (-0.14 %)   | 0.11 (1.30 %)**   | 0.39 (4.46 %)**   | -0.56 (-3.93 %)** | -0.08 (-0.82 %)   |
| Fukue                                    | -0.05 (-2.35 %)** | -0.01 (-1.14 %)** | -0.01 (-0.54 %)   | -0.25 (-5.31 %)** | -0.06 (-2.42 %)** |
| Cape Hedo                                | -0.02 (-2.38 %)** | -0.01 (-1.80 %)** | -0.01 (-0.77 %)** | -0.02 (-1.98 %)** | -0.02 (-1.92 %)** |
| (b) Ground NO <sub>2</sub> concentration |                   |                   |                   |                   |                   |
| Yokosuka                                 | -0.57 (-4.21 %)** | -0.26 (-2.88 %)** | -0.59 (-3.45 %)** | -0.64 (-3.03 %)** | -0.48 (-3.15 %)** |
| Gwangju                                  | -0.12 (-0.88 %)*  | 0.12 (1.25 %)**   | 0.04 (0.31 %)     | -0.10 (-0.67 %)** | -0.11 (-0.86 %)   |
